# Supplementary material for: Combined DFT-D3 Computational and Experimental Studies on g-C3N4: New Insight into Structure, Optical, and Vibrational Properties
Source: MDPI journal article supplement (doi:10.3390/ma16103644), 2023-05-10
Supplement: s1 [file s1]

# Combined DFT-D3 Computational and Experimental Studies on g-C<sub>3</sub>N<sub>4</sub>: New Insight into Structure, Optical, and Vibrational Properties

Paolo Negro\*, Federico Cesano, Silvia Casassa and Domenica Scarano\*

Department of Chemistry and NIS (Nanostructured Interfaces and Surfaces)  
Interdepartmental Centre, University of Torino & INSTM-UdR Torino, Via P. Giuria  
7, 10125 Torino, Italy  
Correspondence: [pa.negro@unito.it](mailto:pa.negro@unito.it) (P.N.); [domenica.scarano@unito.it](mailto:domenica.scarano@unito.it) Tel.: +39-011-6707834 (D.S.)

**Table S1.** Lattice parameters and energy gap of melon system computed with different functionals: PBE-D3, PBE0-D3 and HSE06-D3.

|                           | PBE-D3  | PBE0-D3 | HSE06-D3 |
|---------------------------|---------|---------|----------|
| a [Å]                     | 15.18   | 14.81   | 14.83    |
| b [Å]                     | 12.60   | 12.54   | 12.55    |
| c [Å]                     | 6.55    | 6.57    | 6.61     |
| $\alpha=\beta=\gamma$ [°] | 90      | 90      | 90       |
| V [Å <sup>3</sup> ]       | 1253.61 | 1221.42 | 1230.75  |
| Eg [eV]                   | 2.36    | 4.25    | 3.61     |

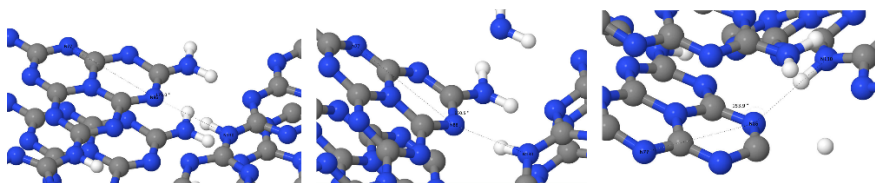

**Figure S1.** Graphical view of bending angles before (175°, on the left side) and after optimization at PBE-D3 (150.5°, in the center) and PBE (153.9°, on the right side) level.

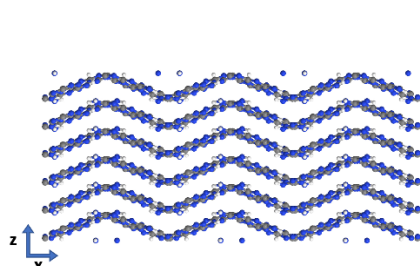

|                                                                         | PBE     | Difference<br>Exp-Teo [%] |
|-------------------------------------------------------------------------|---------|---------------------------|
| a [Å]                                                                   | 15.48   | 4.68                      |
| b [Å]                                                                   | 12.64   | -0.96                     |
| c [Å]                                                                   | 6.89    | -5.67                     |
| $\alpha=\beta=\gamma$ [°]                                               | 90      | 0                         |
| V [Å <sup>3</sup> ]                                                     | 1349.05 | -1.82                     |
| Inter-layer distance [Å]                                                | 3.45    | -5.18                     |
| Bending angle [°]<br>N <sub>77</sub> -N <sub>86</sub> -N <sub>130</sub> | 153.9   | 12.06                     |

**Figure S2.** Melon structure optimized at PBE level and relative structural parameters.

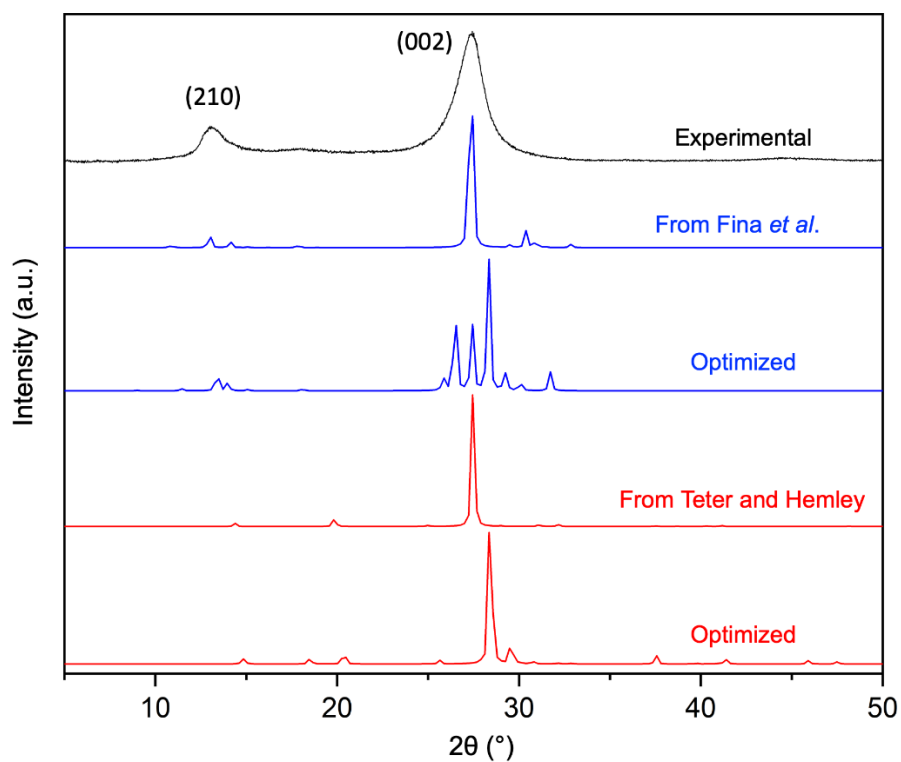

**Figure S3.** Comparison of XRD patterns: experimental (black), obtained from Fina et al. model before and after optimization (blue line), obtained from Teter and Hamley model before and after optimization (red line).

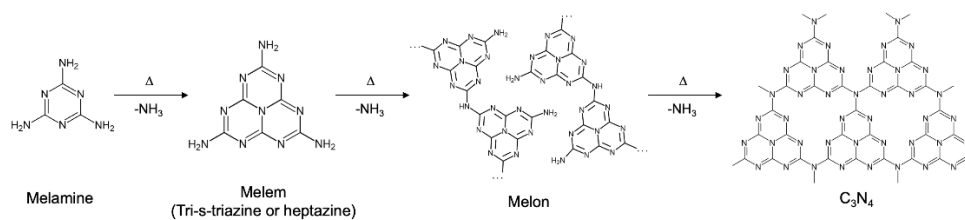

**Figure S4.** Reaction scheme of direct heating of melamine precursor.

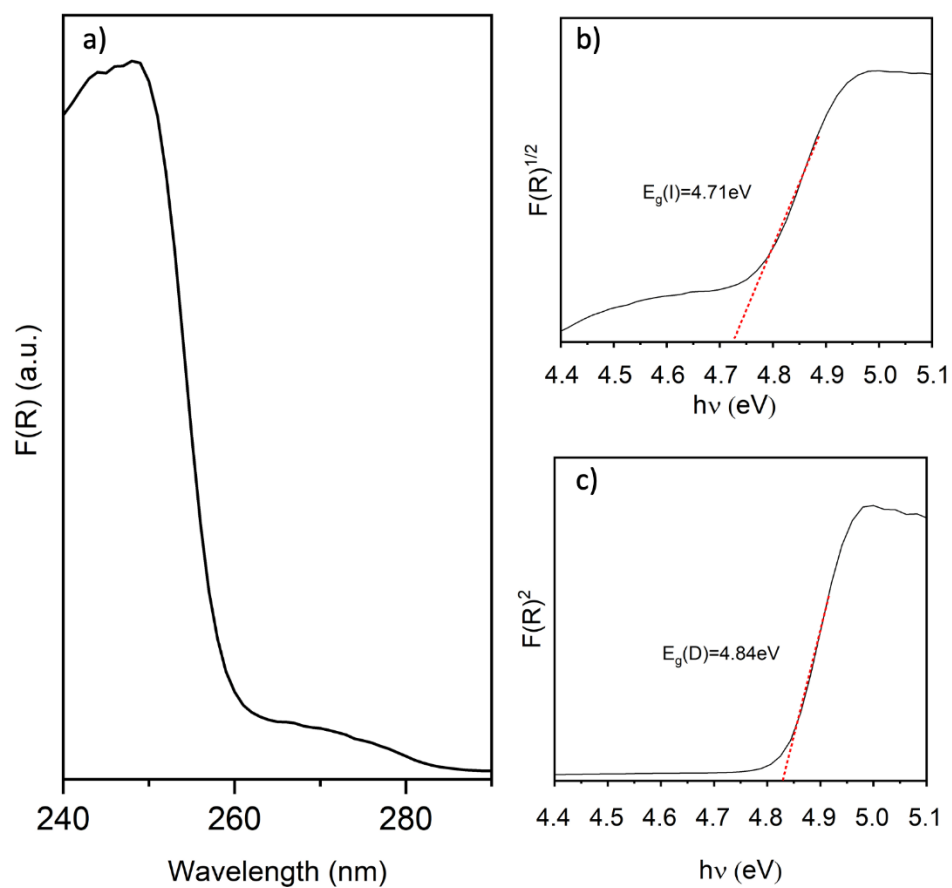

**Figure S5.** UV-vis spectra of melamine (a); the computed Tauc's plots for indirect (b) and direct (c) band gap estimation.
